# Supplementary material
Source: publisher figshare collection journal article supplement (https://acs.figshare.com/ndownloader/files/4095934)
Supplement: Supplementary file 1 [file 4095934]

# Charge Injection Rates in Hybrid Nanosilicon-Polythiophene Bulk Heterojunction Solar Cells: Supporting Information

Alexandra Carvalho,<sup>†</sup> Natalia Martsinovich,<sup>‡</sup> Ricardo Vieira,<sup>†</sup>  
and Alessandro Troisi<sup>‡</sup>

<sup>†</sup> *Department of Physics, I3N, University of Aveiro, Campus Santiago,  
3810-193 Aveiro, Portugal*

<sup>‡</sup> *Department of Chemistry and Center for Scientific Computing, University of Warwick,  
Coventry, West Midlands CV4 7AL, United Kingdom*

## 1 Influence of the exchange and correlation energy functional on the energy levels

A system consisting of a hydrogen-passivated nanocrystal of 17 Si atoms with a physisorbed thiophene (T) molecule [Fig. 1-a)] was used as a benchmark to evaluate the influence of the exchange and correlation energy functional on the alignment between the energy levels of the silicon nanocrystals and those of the mono/oligothiophenes. We performed both an LDA calculation using the method presented in the main article text and a calculation using the hybrid functional of Heyd, Scuseria and Ernzerhof (HSE) [1] (details of the HSE calculations are given below). The HSE functional accurately describes the silicon bandgap (1.31 eV, to compare with the experimental value of 1.12 eV [2]) and the thermodynamic properties of thiophene [1], and therefore can provide insight into the impact of the LDA gap underestimation in our calculations. The results of both calculations are shown in Fig. 1-b). The comparison shows that the exchange energy has a strong effect on the absolute positions of the electronic energy levels, in particular of the unfilled electron states, which are shifted up by about 1 eV. However, it has a weaker effect on the relative alignment between the NC and T levels (the T LUMO is 0.7 eV above the nanocrystal LUMO in LDA, and 0.5 eV in HSE).

**Description of the HSE calculation** The HSE calculations were carried out using the CPMD package [3]. The Kohn-Sham orbitals were expanded in a plane-wave basis set with a cutoff energy of 100 Ry. Norm-conserving Troullier-Martins (TM) pseudopotentials were used. Those were optimised independently from the pseudopotentials used for the SIESTA calculations. Mulliken populations [5]  $\{p_{i\alpha}\}$  for each level  $i$  and atom  $\alpha$  were obtained by projection of the Kohn-Sham wavefunctions into atom-centered Slater orbitals. A localisation function was defined as

$$P_X(E) = \frac{\sum_{\{\alpha \in X\}} p_{i\alpha}}{\sum_{\alpha} p_{i\alpha}} \delta(E_i - E),$$

where  $X$  is either the NC or T, and  $\delta$  is a Gaussian broadening function.

## References

- [1] Heyd, J.; Scuseria, G. E. ; and Ernzerhof, M., *J. Chem. Phys.*, **2003**, *118*, 8207.
- [2] Heyd, J.; and Scuseria, G. E., *J. Chem. Phys.*, **2004**, *121*, 1187.
- [3] Cpmd v3.15.1, copyright ibm corp. 1990-2006 and copyright mpi stuttgart (1997-2008).
- [4] Troullier, N.; Martins, J. L., *Phys. Rev. B*, **1991**, *43*, 1993.
- [5] Mulliken, R. S., *J. Chem. Phys.*, **1955**, *23*, 1833.

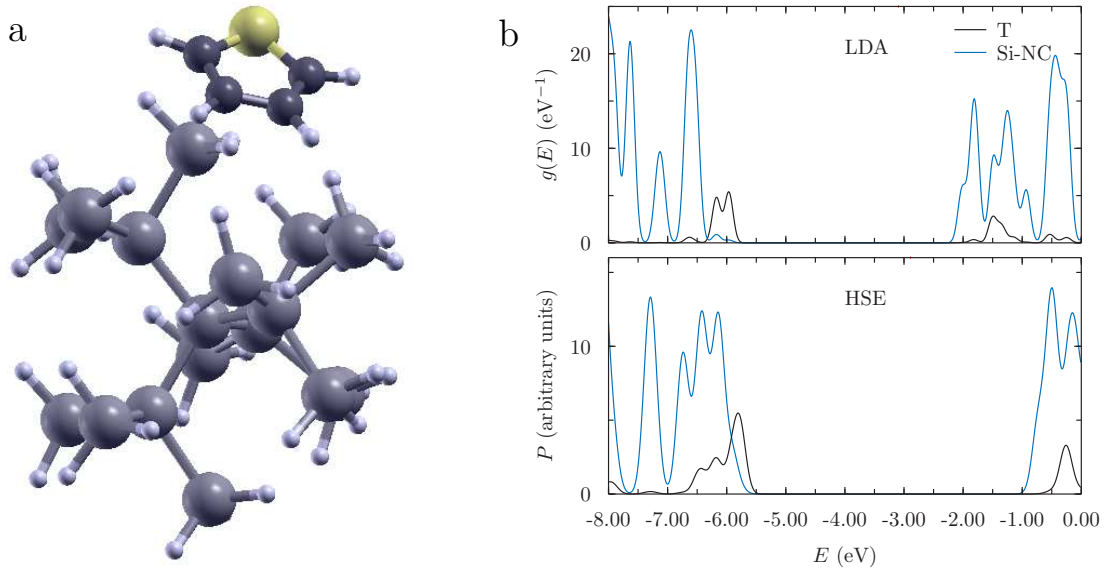

Figure 1: (a) Benchmark system, and (b) comparison of the energy levels and respective projected density of states ( $g$ ) obtained with the LDA with the energy levels, and respective localisation, obtained with the HSE functional.
